# Supplementary material for: Voluntary urination control by brainstem neurons that relax the urethral sphincter
Source: Springer Nature journal article supplement (doi:10.1038/s41593-018-0204-3), 2018-08-10
Supplement: 41593_2018_204_MOESM1_ESM.pdf [file 41593_2018_204_MOESM1_ESM.pdf]

In the format provided by the authors and unedited.

# Voluntary urination control by brainstem neurons that relax the urethral sphincter

Jason A. Keller <sup>1,2</sup>, Jingyi Chen<sup>1,3</sup>, Sierra Simpson <sup>1,3</sup>, Eric Hou-Jen Wang<sup>4</sup>, Varoth Lilascharoen <sup>4</sup>, Olivier George <sup>1</sup>, Byung Kook Lim <sup>5</sup> and Lisa Stowers <sup>1\*</sup>

---

<sup>1</sup>Department of Molecular and Cellular Neuroscience, The Scripps Research Institute, La Jolla, CA, USA. <sup>2</sup>Neurosciences Graduate Program, University of California San Diego, La Jolla, CA, USA. <sup>3</sup>Biomedical Sciences Graduate Program, The Scripps Research Institute, La Jolla, CA, USA. <sup>4</sup>Biomedical Sciences Graduate Program, University of California San Diego, La Jolla, CA, USA. <sup>5</sup>Neurobiology Section, Division of Biological Sciences, University of California San Diego, La Jolla, CA, USA. \*e-mail: [stowers@scripps.edu](mailto:stowers@scripps.edu)

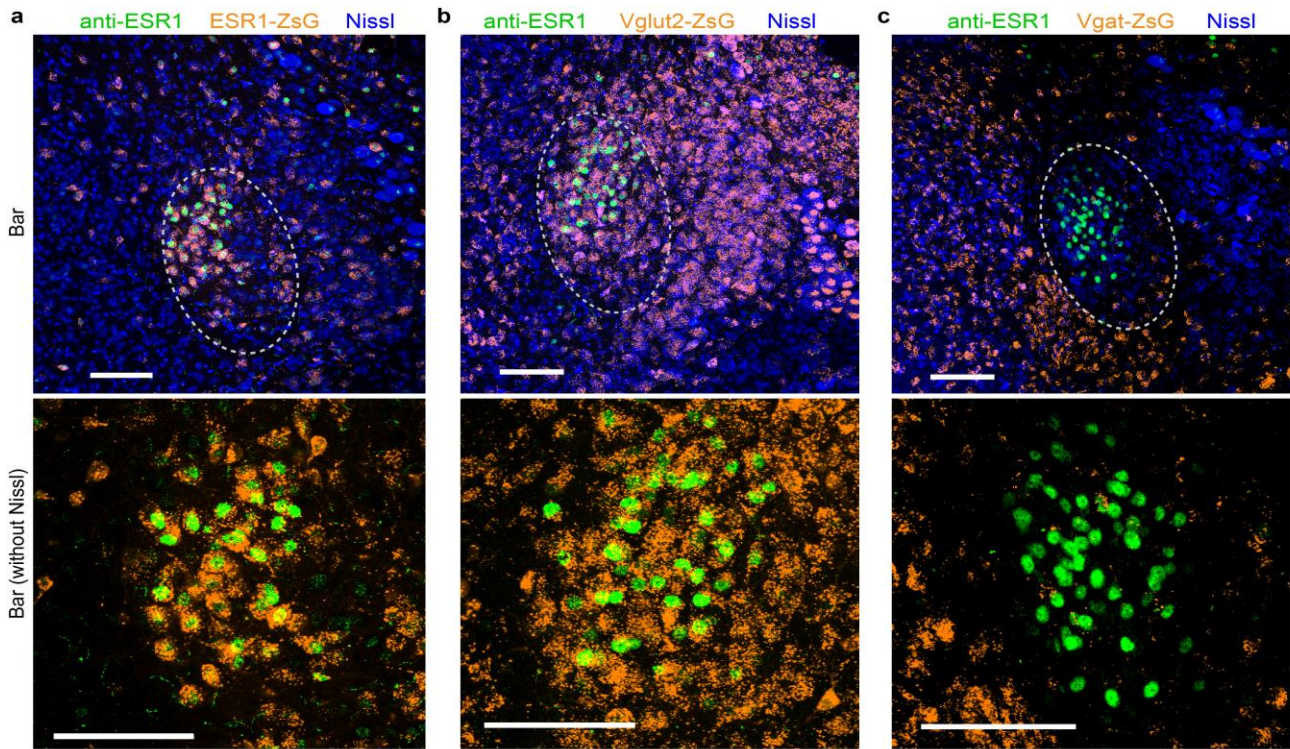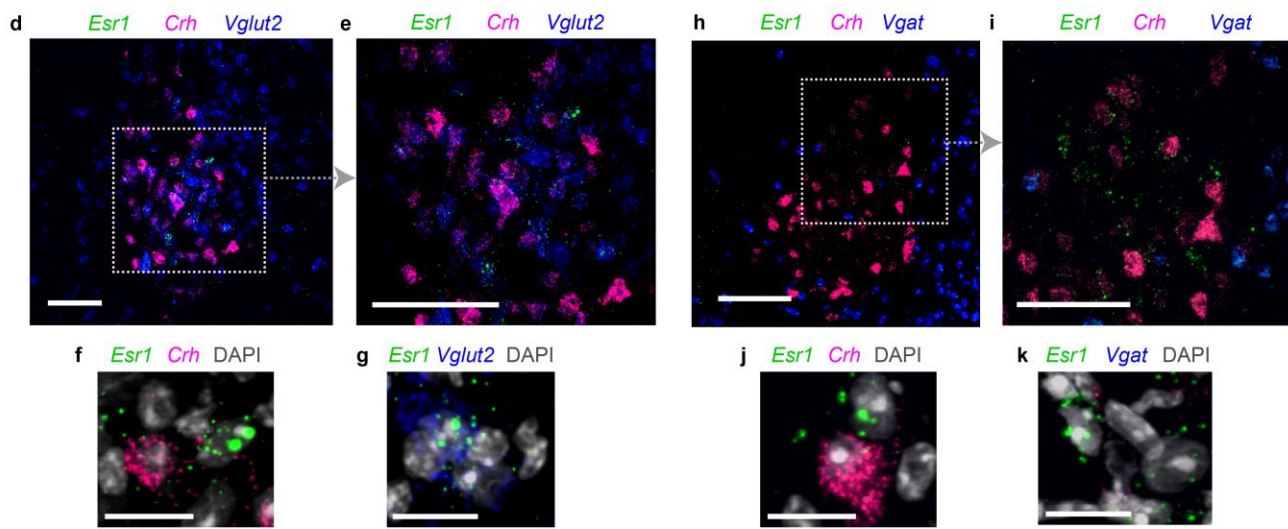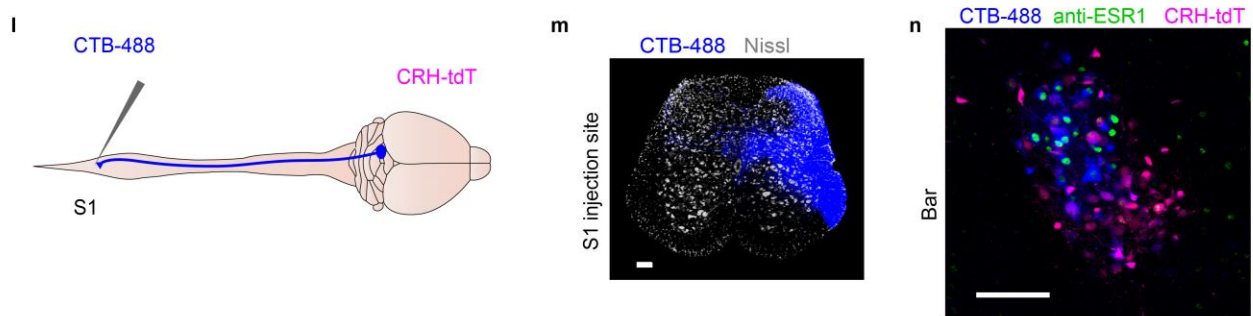

## Supplementary Figure 1

### Neurotransmitter identity and direct spinal projections of Bar<sup>ESR1</sup> neurons.

**a**, Anti-ESR1 overlap with ESR1-ZsGreen (Ai6) genetic reporter. Bottom is larger view without Nissl. **b**, Anti-ESR1 overlap with Vglut2-ZsGreen genetic reporter. **c**, Anti-ESR1 overlap with Vgat-ZsGreen genetic reporter. **d**, RnaScope in-situ hybridization of *Crh/Esr1/Vglut2* mRNA in Bar region of a wild-type male mouse, 20X objective. **e**, Larger view of dotted area in (d), 40X objective. **f, g**, Close-up views of individual cells in (e), with DAPI counterstain. **h-k**, same as (d)-(g), but with *Vgat* mRNA probe. **l**, Schematic of CTB injection into S1 spinal cord. **m**, CTB injection site. **n**, Retrograde CTB labeling in Bar with anti-ESR1 and CRH-tdT. Dotted ovals delineate Bar. Scale bars = 100  $\mu\text{m}$ , except panels f/g/j/k, scale bars = 20  $\mu\text{m}$ .

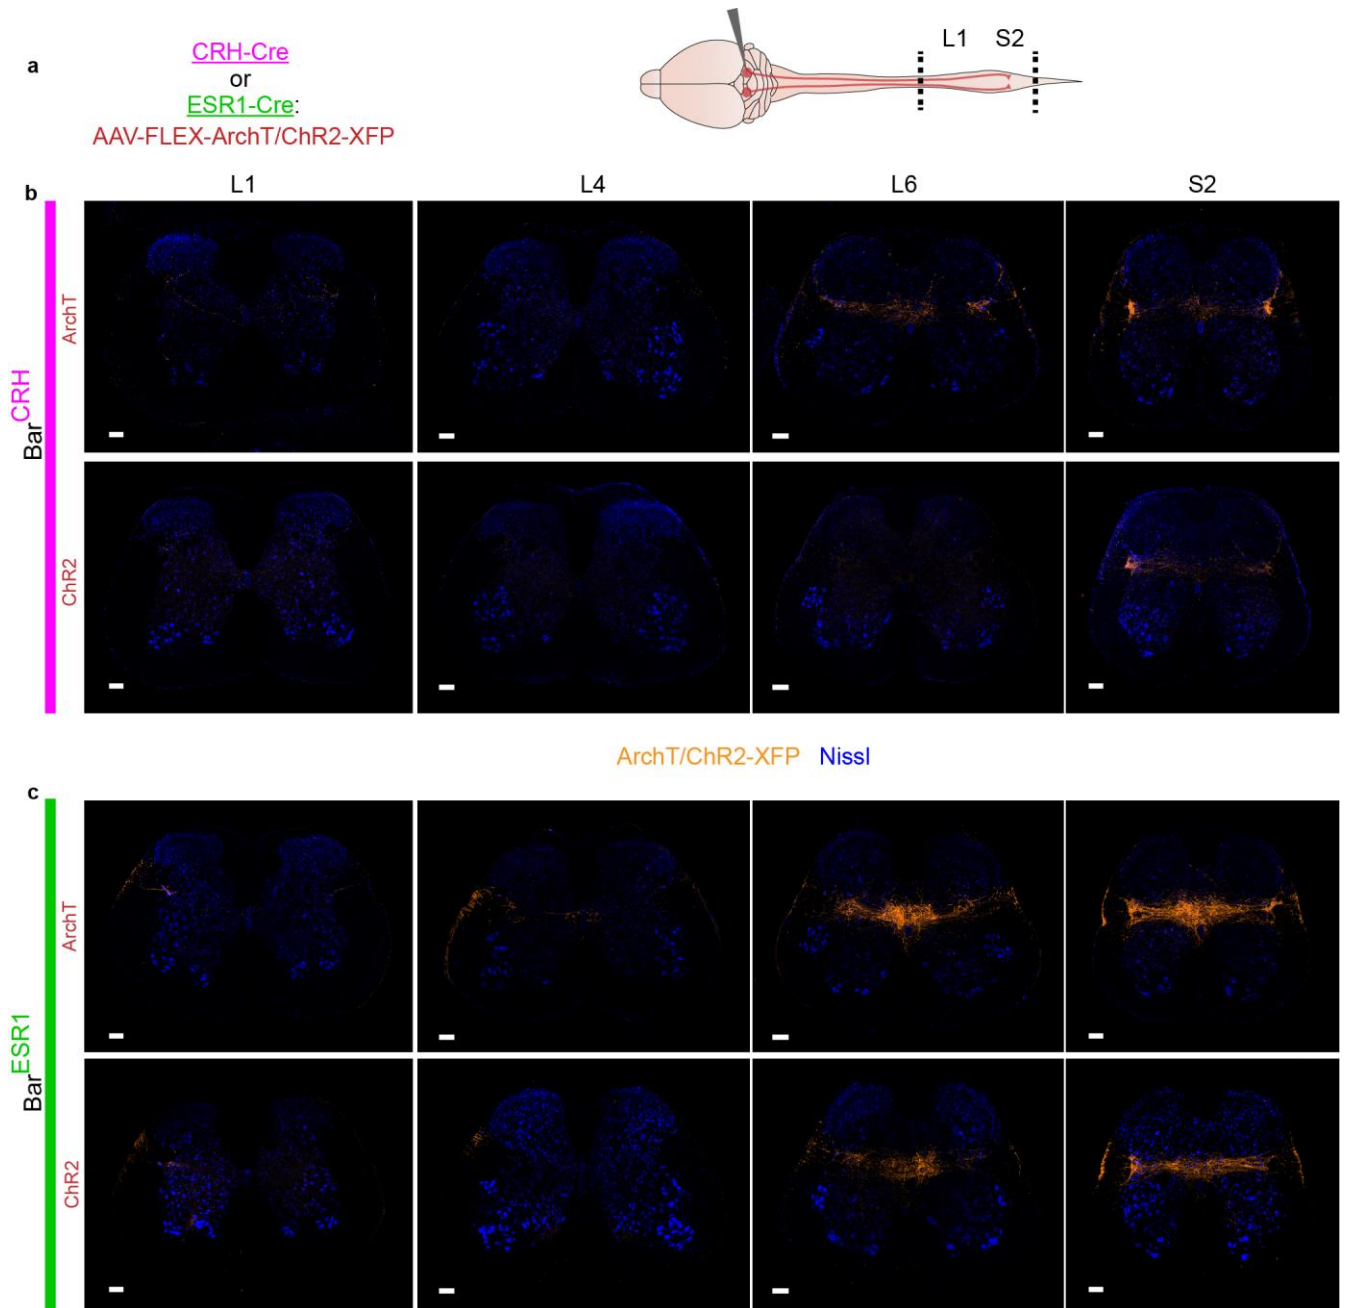

Supplementary Figure 2

**Bar<sup>ESR1</sup> and Bar<sup>CRH</sup> projections to urinary nuclei in the spinal cord.**

**a**, Schematic for testing Bar cell type axonal projections to spinal cord. **b**, Representative Bar<sup>CRH</sup> axon projections at the L1/L4/L6/S2 spinal cord levels, separate from example in Fig. 1g-i. Top is ArchT virus, bottom is ChR2 virus. **c**, Same as (b), but for Bar<sup>ESR1</sup> axon projections. Scale bars = 100  $\mu$ m.



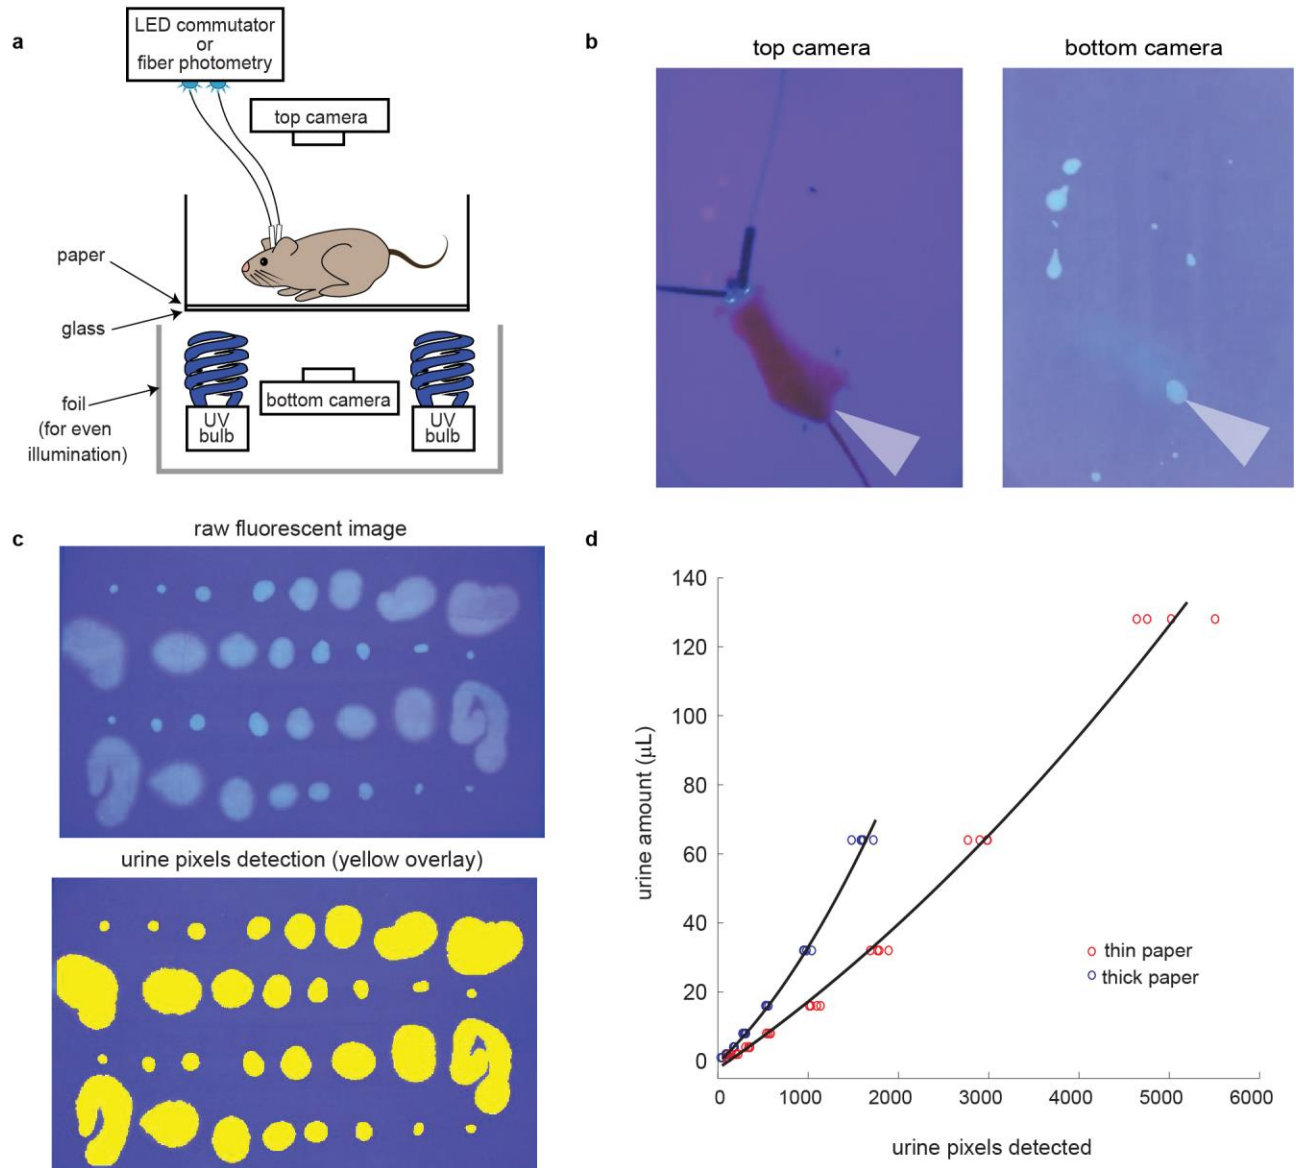

Supplementary Figure 3

### Visualizing and quantifying urination behavior.

**a**, Schematic of behavioral setup for simultaneous optogenetics / fiber photometry, video recording, and analysis of urine excretion of awake behaving mice. **b**, Left: top camera records mouse position, right: urine fluoresces under UV light enabling excretion to be visualized throughout assay. Grey arrow indicates position between synchronized images from top and bottom cameras. **c**, Example of automated urine pixel detection with calibration data consisting of 4 replicates of 8 different volumes of male mouse urine on thin chromatography paper. **d**, Second order polynomial fit to calibration data on thick and thin paper; coefficients from these were used to calculate all urine amounts reported in microliters.

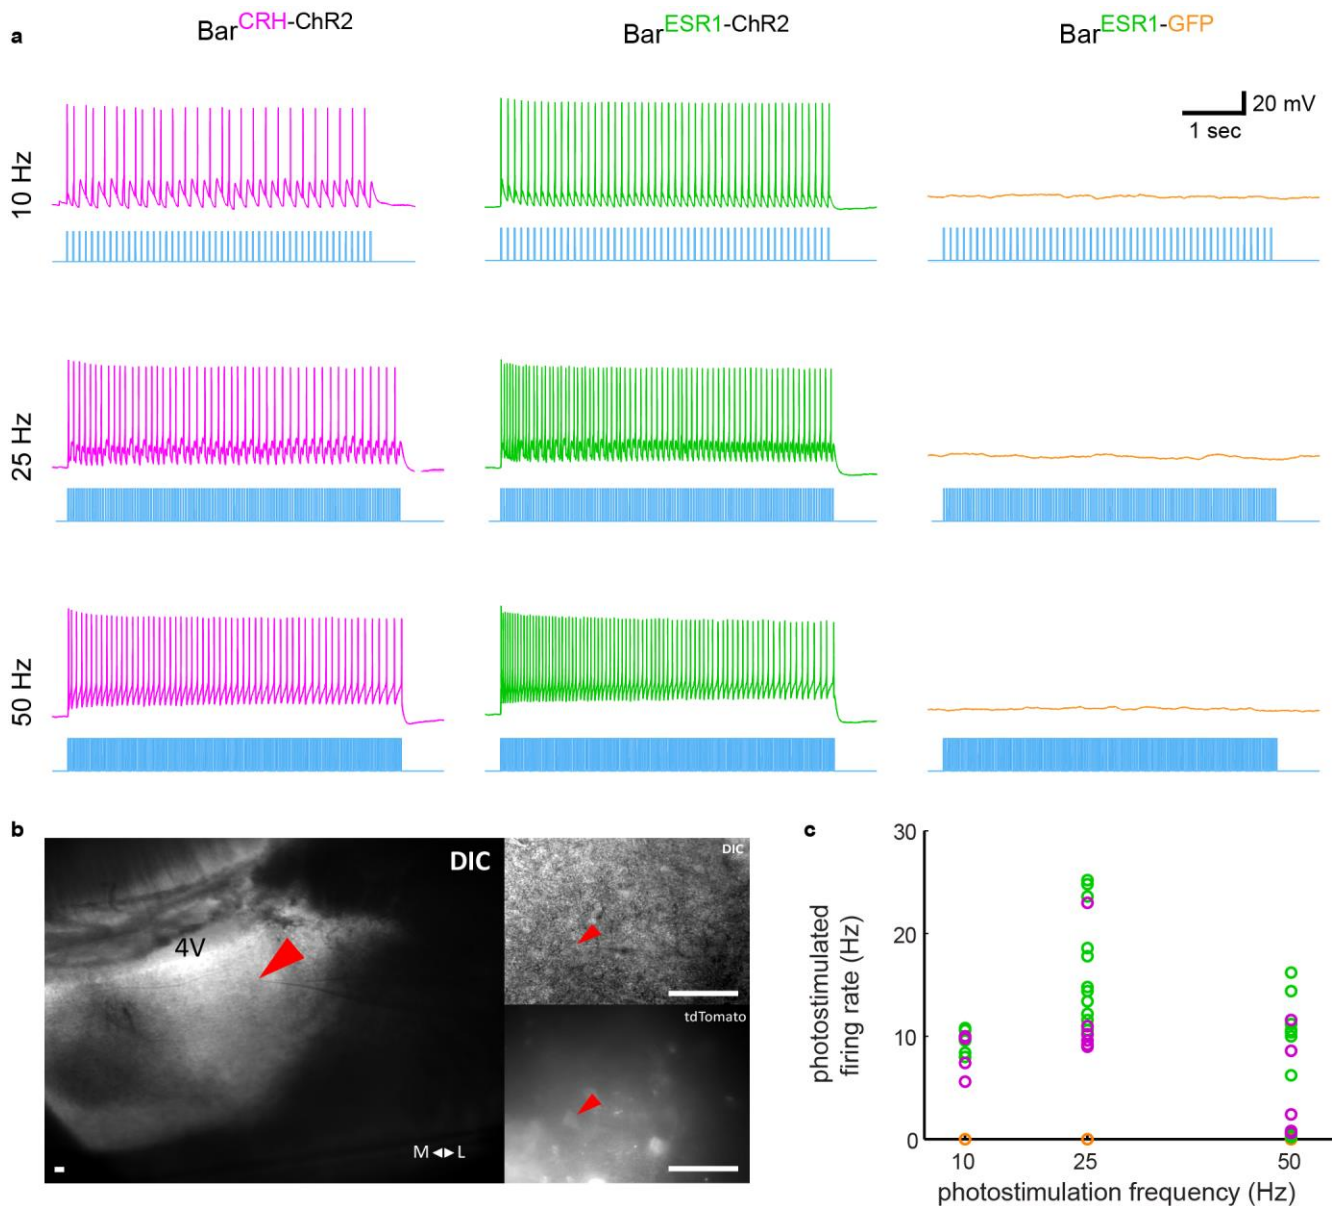

**Supplementary Figure 4**

**Whole-cell recordings of  $\text{Bar}^{\text{CRH-ChR2}}$  and  $\text{Bar}^{\text{ESR1-ChR2}}$  neurons during photostimulation.**

**a**, Example current clamp traces from representative  $\text{Bar}^{\text{CRH-ChR2}}$  (magenta),  $\text{Bar}^{\text{ESR1-ChR2}}$  (green), and  $\text{Bar}^{\text{ESR1-GFP}}$  (orange) neurons during 5 sec photostimulation bouts at 10/25/50 Hz. **b**, Visualization of recording location of  $\text{Bar}^{\text{ESR1-ChR2}}$  neuron in (a) showing ChR2-tdTomato expression. **c**, Stimulated firing rates (each circle represents the mean firing rate during the stimulation period for an individual neuron) versus photostimulation frequency for all recorded  $\text{Bar}^{\text{CRH-ChR2}}$  (magenta, n=6),  $\text{Bar}^{\text{ESR1-ChR2}}$  (green, n=12), and  $\text{Bar}^{\text{ESR1-GFP}}$  (orange, n=4) neurons. Most neurons, particularly  $\text{Bar}^{\text{CRH-ChR2}}$ , are affected by depolarization block at 50 Hz. Scale bars = 100  $\mu\text{m}$ .

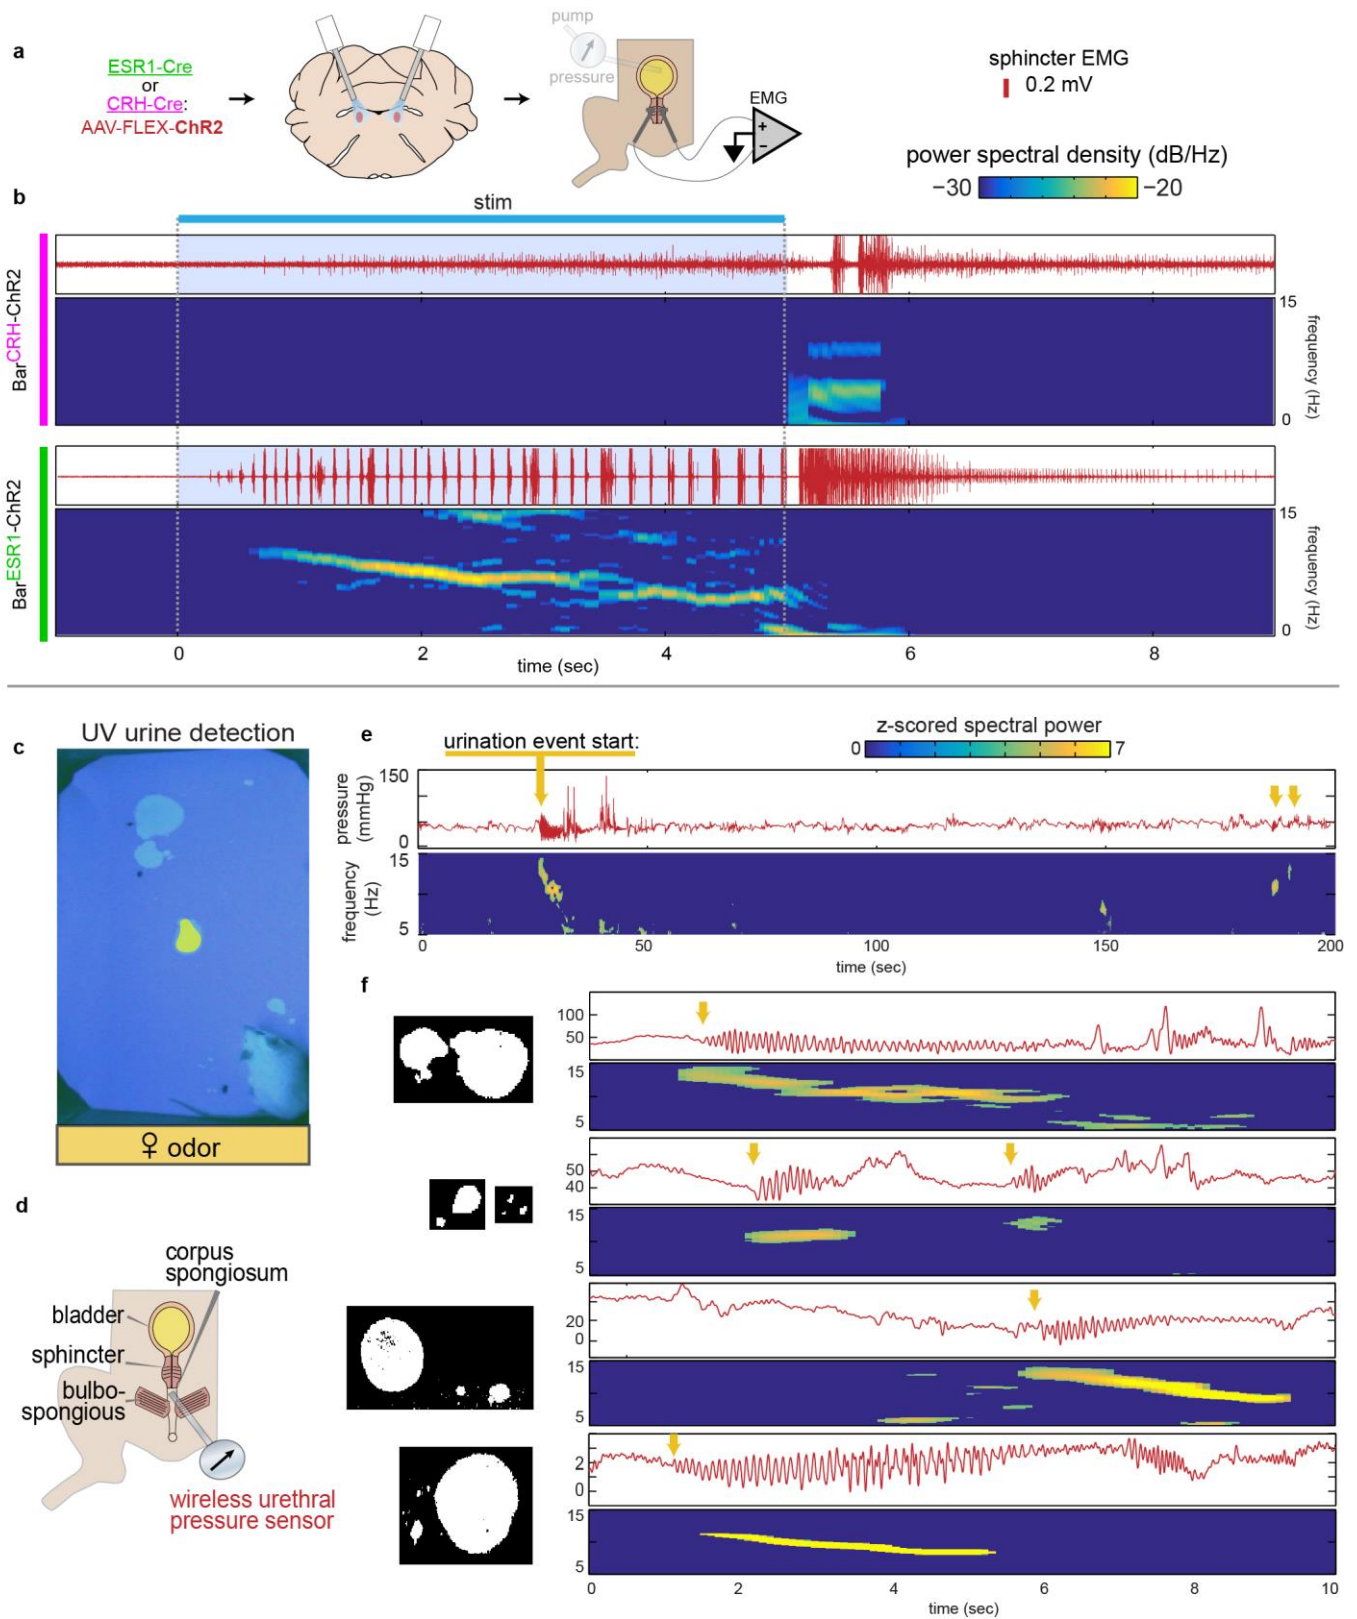

Supplementary Figure 5

## Frequency characteristics of urethral sphincter bursting during natural behavior and after Bar photostimulation.

**a**, Schematic for optogenetic Bar stimulation during EUS EMG recording. **b**, Example raw EUS EMG and corresponding spectral power in the 5-15 Hz band for photostimulated burst responses in Bar<sup>CRH-ChR2</sup> (top) and Bar<sup>ESR1-ChR2</sup> (bottom) mice. Bar<sup>CRH-ChR2</sup> burst is preceded by an increase in tonic activity during the photostimulation period, whereas Bar<sup>ESR1-ChR2</sup> burst occurs at low latency without preceding tonic activity, and displays decreasing frequency characteristic of natural bursts in (f). **c**, Example video frame from wireless corpus spongiosum pressure recording in the presence of female odor (yellow shading). **d**, Schematic of corpus spongiosum recording setup. **e**, Corpus spongiosum pressure recording after presentation of female odor. Top, raw pressure; bottom, spectral power in the 5-15 Hz band. Yellow arrows mark approximate start times for urination events. **f**, Shorter timescale recordings as in (e), for 5 urination events across 2 mice. Binary images on the left show relative sizes of thresholded urine marks corresponding to bursts on the right. Frequency typically decreases over a large burst lasting a few seconds, although shorter bursts with less urine were also observed (2<sup>nd</sup> from top).



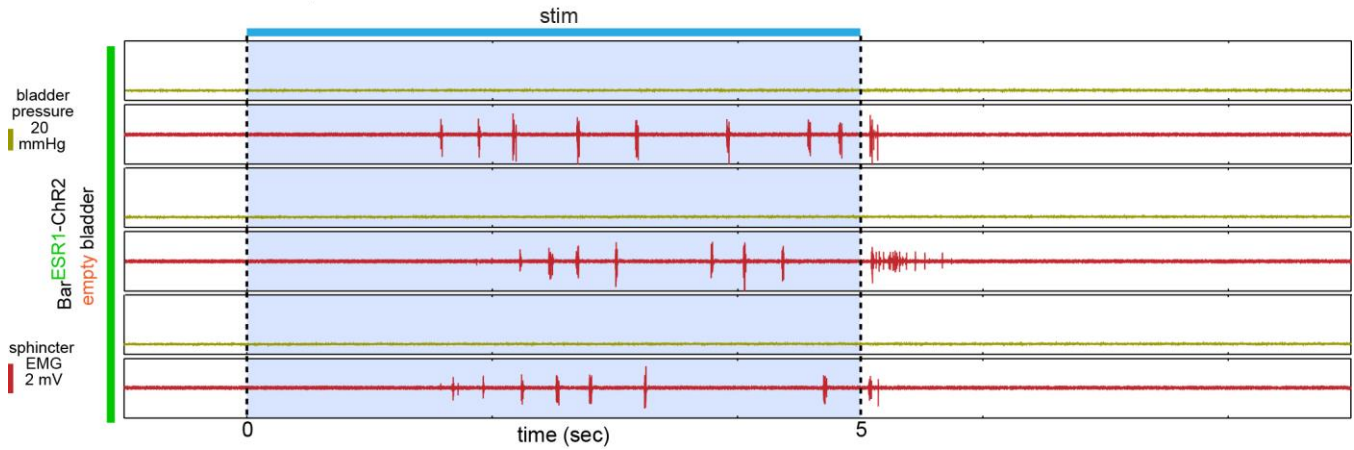

**Supplementary Figure 6**

**Bar<sup>ESR1-ChR2</sup> photostimulation can enable urethral sphincter relaxation without bladder contraction.**

**a**, Three example Bar<sup>ESR1-ChR2</sup> photostimulation trials in the empty bladder condition (from heatmap in Figure 5b), in which burst-like EMG activity was observed in the absence of bladder response. Top/yellow traces are bladder pressure, bottom/red traces are raw EMG. Blue shading and dotted lines delineate photostimulation periods.

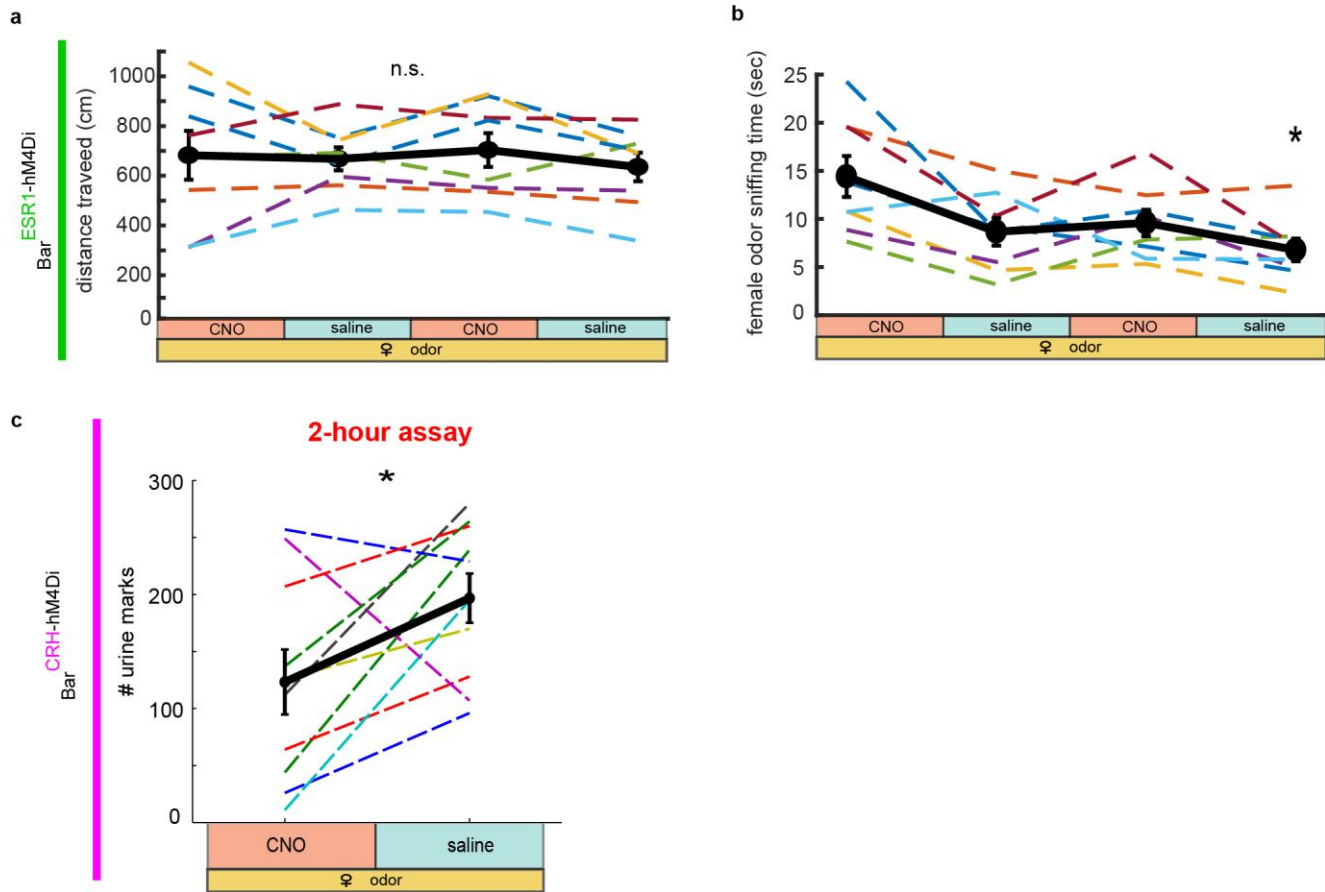

Supplementary Figure 7

**Behavioral controls for Bar<sup>ESR1-hM4Di</sup> and Bar<sup>CRH-hM4Di</sup> chemogenetic inhibition.**

**a**, Total distance traveled during the assay shown in Figure 7a-e for Bar<sup>ESR1-hM4Di</sup> mice (n=8). Thin dotted lines are individuals, thick black line is mean  $\pm$  s.e.m. p=0.58 Friedman's test. **b**, Same as (b), but for total female urine odor sniffing time. p=0.021 Friedman's test, \*day 4 saline p=0.012 Dunn-Sidak posthoc differences from CNO day 1. **c**, Analysis of Bar<sup>CRH-hM4Di</sup> mice (n=10) injected with either saline or CNO on consecutive days prior to a 2-hour urination assay, similar to that previously published<sup>15</sup> and which is not limited to odor-evoked, voluntary urination. \*p=0.049, Mann-Whitney U test for difference between CNO and saline treatment days.

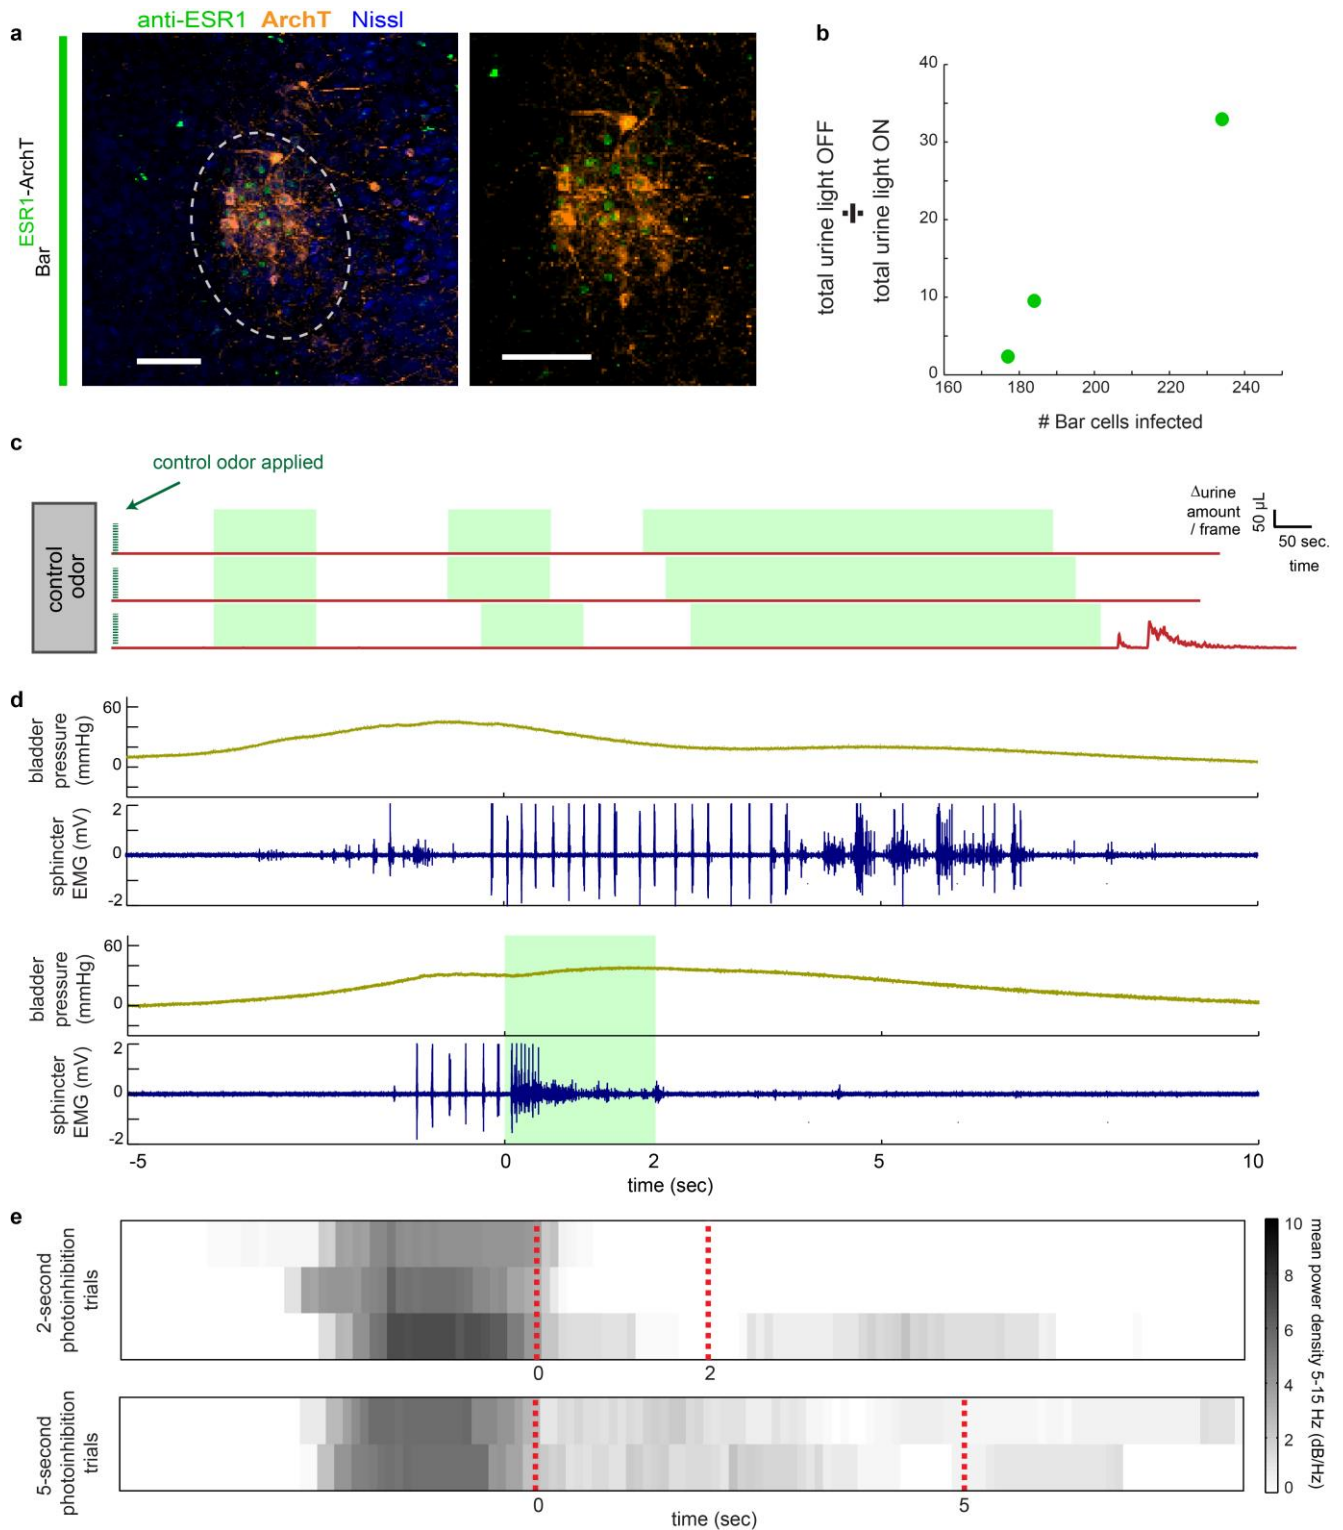

**Supplementary Figure 8**

**Bar<sup>ESR1-ArchT</sup> photoinhibition terminates sphincter bursting during cystometry and does not result in rebound urination in awake mice.**

**a**, Example ArchT-GFP expression in Bar of ESR1-Cre mouse; right, larger views minus Nissl. **b**, Number of Bar cells

infected with ArchT virus versus total urine with light OFF (not inhibited) divided by that with light on (while inhibited) for all mice (n=3). **c**,  $\Delta$ urine amount around two 30 second photoinhibition periods followed by one 2 min. photoinhibition period, during which control odor only was present. n=9 total photoinhibition bouts from 3 mice. **d**, Bladder pressure and sphincter EMG during cystometry, top, with natural unimpeded cycling, and bottom, in which 2 seconds of Bar<sup>ESR1-ArchT</sup> photoinhibition was triggered as soon as filling evoked bursting was detected, which terminates bursting within ~100ms, often followed by tonic contractions such as with cessation of ChR2 photostimulation. **e**, Heatmap of mean EMG power density at bursting frequencies (5-15 Hz) during Bar<sup>ESR1-ArchT</sup> photoinhibition as in bottom of panel d (top: 2 second inhibition trials; bottom: 5 second inhibition trials; n=2 mice). Green shading or red dotted lines mark photoinhibition periods. Scale bars = 100  $\mu$ m.

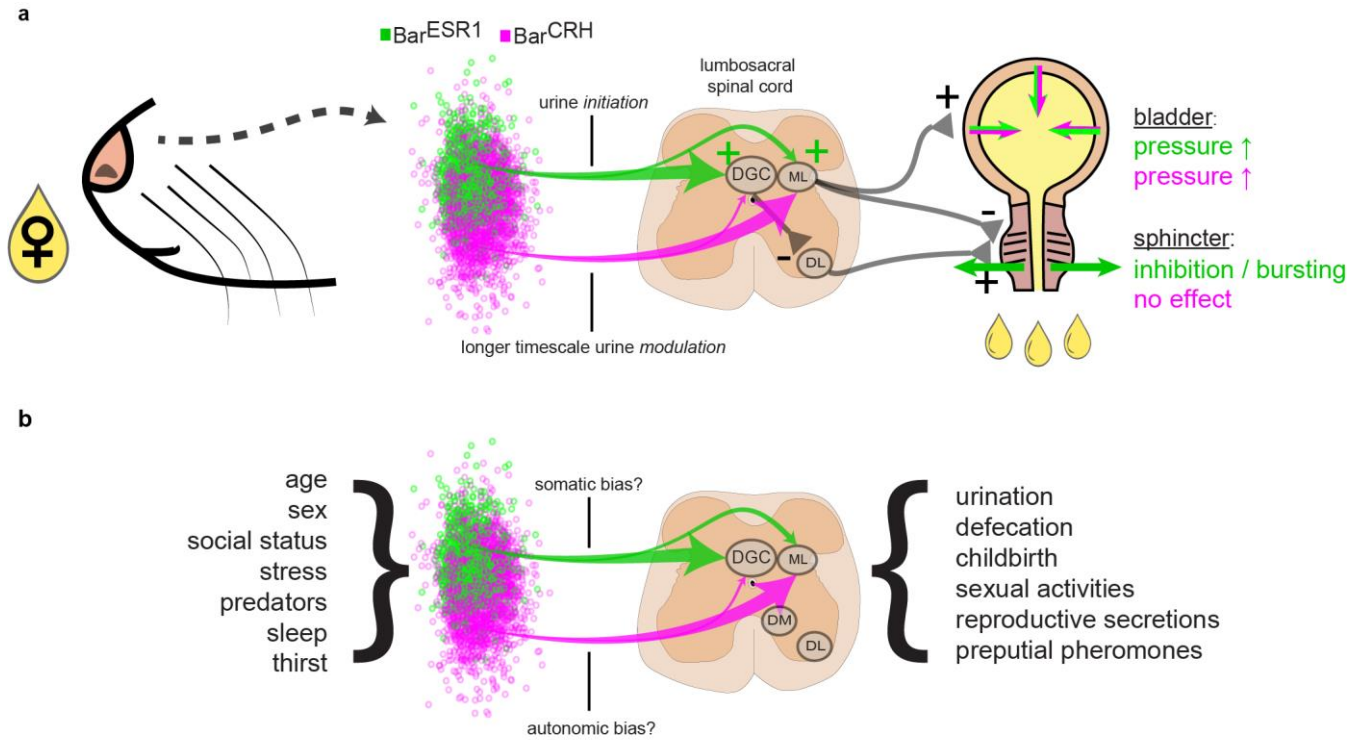

Supplementary Figure 9

**Simplified summary of a nose-to-sphincter circuit and other potential Bar functions.**

**a**, Bar<sup>ESR1</sup> (green) and Bar<sup>CRH</sup> (magenta) neurons are intermingled (cell overlay from Fig. 1d), and the minority Bar<sup>ESR1</sup> population projects to both the mediolateral column (ML) and heavier to the dorsal grey commissure (DGC), which directly inhibits sphincter motoneurons in the dorsolateral nucleus (DL). Activation of Bar<sup>ESR1</sup> neurons increases bladder pressure and simultaneously inhibits the sphincter via bursting, thus driving efficient urine excretion, whereas activation of Bar<sup>CRH</sup> neurons produces a focal increase in bladder pressure and either no effect at the sphincter or a tonic excitation resembling the guarding reflex. Thoracolumbar projections of Bar<sup>ESR1</sup> neurons are not shown, as well as afferent feedback connections from bladder and urethra. **b**, Many factors influence a variety of pelvic functions, and heterogeneity in Bar may allow differential coordination of both somatic and autonomic targets for various behaviors.
